# Supplementary material
Source: Elsevier journal article supplement (https://www.sciencedirect.com/science/article/pii/S0301054616000070)
Supplement: mmc1 [file S0301054616000070:mmc1.docx]

**Table E1** Association positive LTPs.

|  | Pru p 3+ | Jug r 3+ | Ara h 9+ | Cor a 8+ | Tri a 14+ | Pla a 3+ | Art v 3+ | Ole e 7+ |
| --- | --- | --- | --- | --- | --- | --- | --- | --- |
| Pru p 3+ | - | 88.1 | 100 | 95.8 | 78.1 | 97.5 | 97 | 96.9 |
| Jug r 3+ | 82.4 | - | 94.5 | 93.1 | 70.8 | 97.5 | 98.5 | 100 |
| Ara h 9+ | 67.6 | 68.3 | - | 87.5 | 42.9 | 82.5 | 86.6 | 93.8 |
| Cor a 8+ | 63.9 | 66.3 | 86.3 | - | 43.8 | 80 | 83.6 | 93.8 |
| Tri a 14+ | 26.2 | 32.7 | 43.8 | 41.7 | - | 40 | 43.3 | 59.4 |
| Pla a 3+ | 72.2 | 77.2 | 90.4 | 88.9 | 50 | - | 92.5 | 93.8 |
| Art v 3+ | 60.2 | 65.3 | 79.5 | 77.8 | 39.6 | 77.5 | - | 93.8 |
| Ole e 7+ | 28.7 | 31.7 | 41.1 | 41.7 | 13.5 | 37.5 | 44.8 | - |

**Table E2** Sensitisation rates to each panallergen.

| **Component** | **Not sensitized (%)** | **Sensitized (%)** | **Sensitized (Absolute numbers, out of 130 patients)** |
| --- | --- | --- | --- |
|  |  |  |  |
| Ana o 2 | 83,1 | 16,9 | 22 |
| Ver e 1 | 93,1 | 6,9 | 9 |
| Cor a 9 | 84,6 | 15,4 | 20 |
| Jug r 1 | 63,8 | 36,2 | 47 |
| Jug r 2 | 67,7 | 32,3 | 42 |
| Ses i 1 | 81,5 | 18,5 | 24 |
| Ara h 1 | 84,6 | 15,4 | 20 |
| Ara h 3 | 95,4 | 4,6 | 6 |
| Ara h 6 | 76,9 | 23,1 | 30 |
| Gly m 5 | 90 | 10 | 13 |
| Gly m 6 | 84,6 | 15,4 | 20 |
| Act d 1 | 76,9 | 23,1 | 30 |
| Act d 5 | 99,2 | 0,8 | 1 |
| Bet v 4 | 97,7 | 2,3 | 3 |
| Phl p 7 | 98,5 | 1,5 | 2 |
| Aln g 1 | 96,2 | 3,8 | 5 |
| Bet v 1 | 93,6 | 6,4 | 8 |
| Cor a 1.0101 | 97,7 | 2,3 | 3 |
| Cor a 10201 | 95,4 | 4,6 | 6 |
| Mal d 1 | 91,5 | 8,5 | 11 |
| Pru p 1 | 94,6 | 5,4 | 7 |
| Gly m 4 | 96,9 | 3,1 | 4 |
| Ara h 8 | 96,9 | 3,1 | 4 |
| Act d 8 | 99,2 | 0,8 | 1 |
| Api g 1 | 96,9 | 3,1 | 4 |
